# Supplementary material for: Shanxi Aged Vinegar Protects against Alcohol-Induced Liver Injury via Activating Nrf2-Mediated Antioxidant and Inhibiting TLR4-Induced Inflammatory Response
Source: PubMed Central journal article supplement (PMC6073858; doi:10.3390/nu10070805), 2018-06-22
Supplement: nutrients-10-00805-s001.pdf [file nutrients-10-00805-s001.pdf]

**A**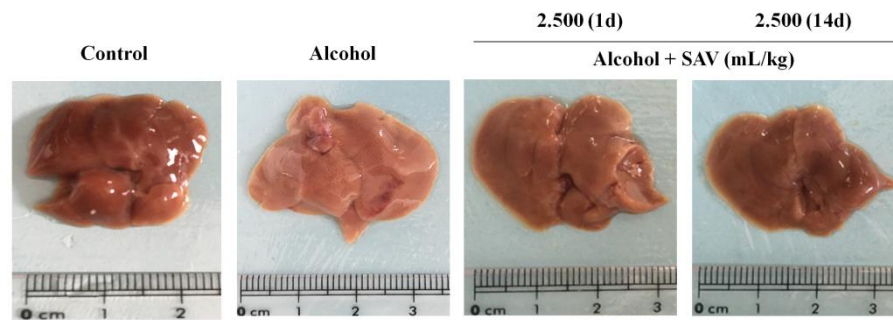**B**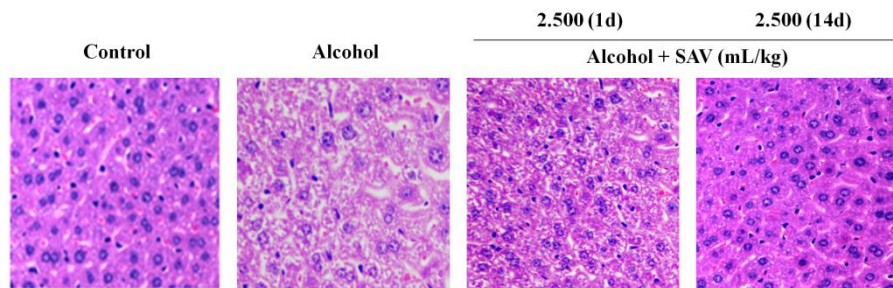**C**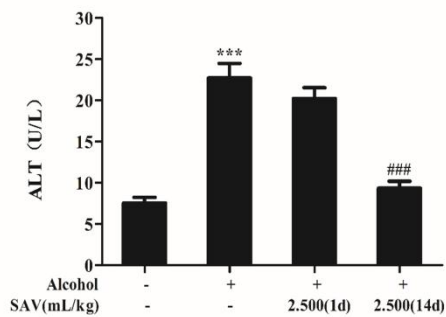**D**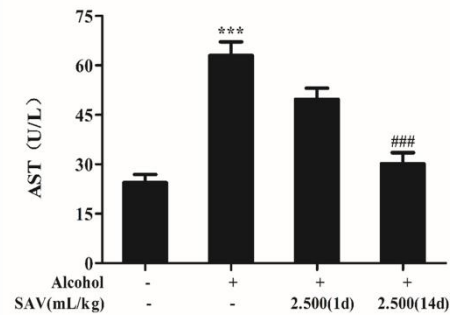

**Supplementary material 1.** Effects of single-dose and 14-day SAV in alcohol-treated mice. (A) Gross examination of mice livers. (B) Histological examination of liver sections stained with H&E. (200× magnification) Serum levels of ALT (C) and AST (D) were measured with microplate reader. All data are expressed as mean ± SEM (n = 5-7). \*\*\*P < 0.001 versus control group, ###P < 0.001 versus ethanol group.
